# Supplementary material for: Identification and structure–activity relationship analysis of minimal fusion inhibitors targeting measles virus F protein
Source: Royal Society of Chemistry journal article supplement (doi:10.1039/d6md00211k), 2026-05-13
Supplement: d6md00211k5.pdf [file d6md00211k5.pdf]

*Supplementary Information*

Identification and Structure-Activity Relationship Analysis of Minimal Fusion  
Inhibitors Targeting Measles Virus F Protein

Kazuya Kobayashi<sup>a</sup>, Yuki Yamaguchi<sup>a</sup>, Mizuki Itahara<sup>a</sup>, Kazushige Hirata<sup>b</sup>, Keisuke Aoki<sup>a,c</sup>, Naoya Iwamoto<sup>a</sup>, Hironori Hayashi<sup>d</sup>, Eiichi Kodama<sup>d,e</sup> and Shinya Oishi<sup>\*,a</sup>

<sup>a</sup> Laboratory of Medicinal Chemistry, Kyoto Pharmaceutical University, Kyoto 607-8412, Japan

<sup>b</sup> Department of Clinical Laboratory Medicine, Tohoku University Hospital, Sendai 980-8574, Japan

<sup>c</sup> Graduate School of Pharmaceutical Sciences, Kyoto University, Kyoto 606-8501, Japan

<sup>d</sup> Division of Infectious Diseases, International Research Institute of Disaster Science, Tohoku University, Sendai 980-8575, Japan

<sup>e</sup> Department of Infectious Diseases, Graduate School of Medicine and Tohoku Medical Megabank Organization, Tohoku University, Sendai 980-8575, Japan

Table of Contents

|                                                                                                                        |       |
|------------------------------------------------------------------------------------------------------------------------|-------|
| Antiviral activity of peptides <b>3</b> and <b>4</b> against wild-type and resistant measles viral strains. (Table S1) | S2    |
| CD analysis of peptides <b>4</b> and <b>15–17</b> in the presence of the HR1-40 (Fig. S1)                              | S2    |
| Molecular models of the six-helical bundle formed by peptide <b>17</b> and HR1Y+8 (Fig. S2)                            | S3    |
| Characterization data of synthetic peptides by electrospray ionization mass spectrometry (Table S2)                    | S4–S5 |
| HPLC chromatograms of purified synthetic peptides (Fig. S3)                                                            | S6–S9 |
| Reference                                                                                                              | S10   |

**Table S1.** Antiviral activity of peptides **3** and **4** against wild-type and resistant measles viral strains.

| Peptide              | EC <sub>50</sub> (μM) <sup>a</sup><br>[pEC <sub>50</sub> ± SD] |                                                          |                                                          |                                                          |
|----------------------|----------------------------------------------------------------|----------------------------------------------------------|----------------------------------------------------------|----------------------------------------------------------|
|                      | MeV <sub>WT</sub>                                              | MeV <sub>M1<sup>R</sup><sub>p29</sub></sub> <sup>b</sup> | MeV <sub>M1<sup>R</sup><sub>p62</sub></sub> <sup>b</sup> | MeV <sub>M2<sup>R</sup><sub>p44</sub></sub> <sup>b</sup> |
| MEK35GT ( <b>3</b> ) | 0.0021<br>[8.7 ± 0.3]                                          | 0.0022<br>[8.7 ± 0.3]                                    | 0.0015<br>[8.8 ± 0.4]                                    | 0.0027<br>[8.6 ± 0.4]                                    |
| MEK28GT ( <b>4</b> ) | 0.0092<br>[8.0 ± 0.3]                                          | 1.5<br>[5.8 ± 0.6]                                       | 0.97<br>[6.0 ± 0.3]                                      | 1.3<br>[5.9 ± 0.2]                                       |

<sup>a</sup>The concentration required to inhibit viral replication by 50%. <sup>b</sup>MeV<sub>M1<sup>R</sup><sub>p29</sub></sub>, MeV<sub>M1<sup>R</sup><sub>p62</sub></sub>, and MeV<sub>M2<sup>R</sup><sub>p44</sub></sub> carry the A167E mutation, N158S/A167E/Y349H mutations, and A167E/K244R mutations, respectively, in the fusion peptide (FP) region.<sup>S1</sup>

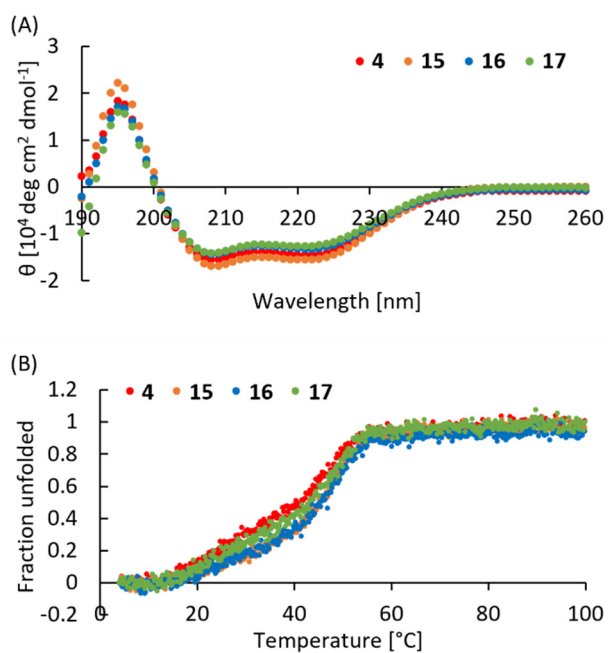**Fig. S1.** CD analysis of peptides **4** and **15–17** in the presence of the HR1-40. (A) CD spectra. (B) Thermal stability of the six-helical bundles.

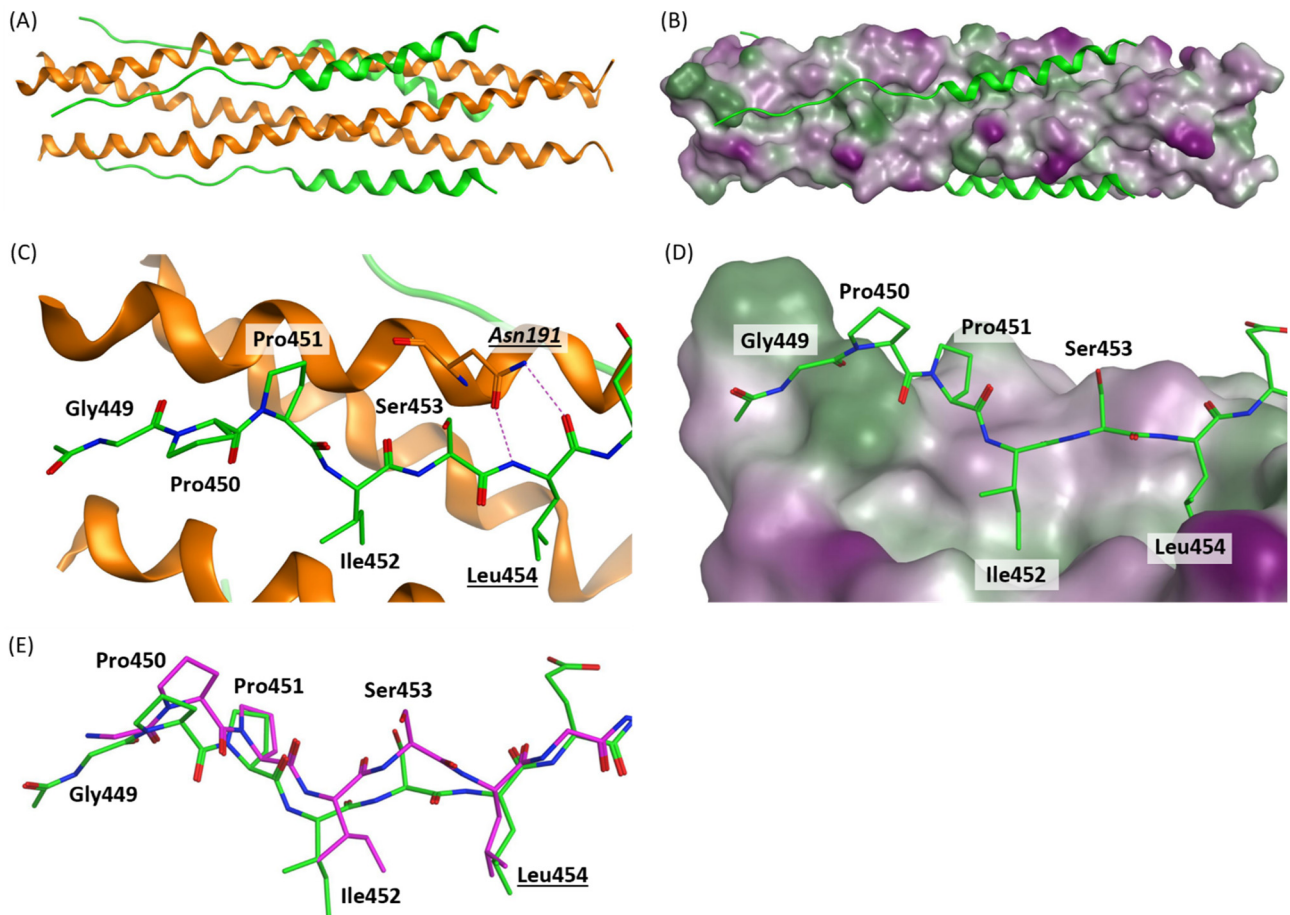

**Fig. S2.** Molecular models of the six-helical bundle formed by peptide **17** (green) and HR1Y+8 (orange). HR1Y+8 residues are shown in italics. (A) Overall view of the six-helical bundle. (B) Overall view of the six-helical bundle with the surface of the HR1Y+8 trimer rendered according to lipophilicity (purple, hydrophilic; gray, neutral; green, lipophilic). (C) Close-up view of the N-terminal region of **17**. Residues involved in hydrogen bonding are underlined. (D) Close-up view of the N-terminal region of **17** with the surface of the HR1Y+8 trimer rendered according to lipophilicity. (E, F) Superposition of the N-terminal region of **17** with the corresponding region in the postfusion MV F protein structure (PDB ID: 8UTF, purple).

**Table S2.** Characterization data of synthetic peptides by electrospray ionization mass spectrometry (ESI-MS).

| Peptide        | Formula                                                             | MW      | <i>m/z</i>           |         |          |
|----------------|---------------------------------------------------------------------|---------|----------------------|---------|----------|
|                |                                                                     |         |                      | Calcd.  | Observed |
| HR1-40         | C <sub>188</sub> H <sub>311</sub> N <sub>57</sub> O <sub>65</sub> S | 4441.95 | [M+4H] <sup>4+</sup> | 1111.50 | 1112.13  |
|                |                                                                     |         | [M+3H] <sup>3+</sup> | 1481.66 | 1482.26  |
| MEK35GT (3)    | C <sub>182</sub> H <sub>323</sub> N <sub>49</sub> O <sub>56</sub>   | 4093.87 | [M+5H] <sup>5+</sup> | 819.78  | 819.93   |
|                |                                                                     |         | [M+4H] <sup>4+</sup> | 1024.48 | 1024.70  |
|                |                                                                     |         | [M+3H] <sup>3+</sup> | 1365.63 | 1365.75  |
| MEK28GT (4)    | C <sub>145</sub> H <sub>258</sub> N <sub>40</sub> O <sub>44</sub>   | 3265.90 | [M+4H] <sup>4+</sup> | 817.48  | 817.58   |
|                |                                                                     |         | [M+3H] <sup>3+</sup> | 1089.64 | 1089.82  |
|                |                                                                     |         | [M+2H] <sup>2+</sup> | 1633.96 | 1633.74  |
| MEK21GT (5)    | C <sub>108</sub> H <sub>193</sub> N <sub>31</sub> O <sub>33</sub>   | 2453.92 | [M+3H] <sup>3+</sup> | 818.98  | 818.56   |
|                |                                                                     |         | [M+2H] <sup>2+</sup> | 1227.97 | 1227.51  |
| MEK14GT (6)    | C <sub>71</sub> H <sub>127</sub> N <sub>21</sub> O <sub>22</sub>    | 1626.92 | [M+2H] <sup>2+</sup> | 814.47  | 814.01   |
| MEK28GT-1 (7)  | C <sub>139</sub> H <sub>247</sub> N <sub>39</sub> O <sub>43</sub>   | 3152.74 | [M+4H] <sup>4+</sup> | 789.19  | 789.08   |
|                |                                                                     |         | [M+3H] <sup>3+</sup> | 1051.92 | 1051.86  |
| MEK28GT-2 (8)  | C <sub>136</sub> H <sub>242</sub> N <sub>38</sub> O <sub>41</sub>   | 3065.66 | [M+4H] <sup>4+</sup> | 767.42  | 767.28   |
|                |                                                                     |         | [M+3H] <sup>3+</sup> | 1022.89 | 1022.84  |
| MEK28GT-3 (9)  | C <sub>130</sub> H <sub>231</sub> N <sub>37</sub> O <sub>40</sub>   | 2952.50 | [M+4H] <sup>4+</sup> | 739.13  | 738.96   |
|                |                                                                     |         | [M+3H] <sup>3+</sup> | 985.17  | 985.01   |
|                |                                                                     |         | [M+2H] <sup>2+</sup> | 1477.26 | 1477.15  |
| MEK28GT-4 (10) | C <sub>125</sub> H <sub>224</sub> N <sub>36</sub> O <sub>37</sub>   | 2823.38 | [M+4H] <sup>4+</sup> | 706.85  | 706.63   |
|                |                                                                     |         | [M+3H] <sup>3+</sup> | 942.13  | 941.91   |
|                |                                                                     |         | [M+2H] <sup>2+</sup> | 1412.70 | 1412.60  |
| MEK28GT-5 (11) | C <sub>119</sub> H <sub>212</sub> N <sub>32</sub> O <sub>36</sub>   | 2667.19 | [M+3H] <sup>3+</sup> | 890.07  | 889.95   |
|                |                                                                     |         | [M+2H] <sup>2+</sup> | 1334.60 | 1334.59  |
| MEK28GT-6 (12) | C <sub>113</sub> H <sub>201</sub> N <sub>31</sub> O <sub>35</sub>   | 2554.03 | [M+3H] <sup>3+</sup> | 852.35  | 852.24   |
|                |                                                                     |         | [M+2H] <sup>2+</sup> | 1278.02 | 1278.06  |
| MEK28GT-7 (13) | C <sub>109</sub> H <sub>196</sub> N <sub>30</sub> O <sub>32</sub>   | 2438.95 | [M+3H] <sup>3+</sup> | 813.99  | 813.83   |
|                |                                                                     |         | [M+2H] <sup>2+</sup> | 1220.48 | 1220.48  |
| MEK28GT-8 (14) | C <sub>104</sub> H <sub>187</sub> N <sub>29</sub> O <sub>31</sub>   | 2339.81 | [M+3H] <sup>3+</sup> | 780.94  | 780.79   |
|                |                                                                     |         | [M+2H] <sup>2+</sup> | 1170.91 | 1170.93  |
| MEK28GT+1 (15) | C <sub>150</sub> H <sub>265</sub> N <sub>41</sub> O <sub>45</sub>   | 3363.01 | [M+4H] <sup>4+</sup> | 841.76  | 841.25   |
|                |                                                                     |         | [M+3H] <sup>3+</sup> | 1122.01 | 1121.59  |
| MEK28GT+2 (16) | C <sub>155</sub> H <sub>272</sub> N <sub>42</sub> O <sub>46</sub>   | 3460.13 | [M+4H] <sup>4+</sup> | 866.04  | 865.57   |
|                |                                                                     |         | [M+3H] <sup>3+</sup> | 1154.38 | 1153.99  |
| MEK28GT+3 (17) | C <sub>157</sub> H <sub>275</sub> N <sub>43</sub> O <sub>47</sub>   | 3517.18 | [M+4H] <sup>4+</sup> | 880.30  | 879.85   |
|                |                                                                     |         | [M+3H] <sup>3+</sup> | 1173.40 | 1173.02  |

**Table S2.** (continued) Characterization data of synthetic peptides by ESI-MS.

| Peptide                     | Formula                                                                          | MW      | <i>m/z</i>           |         |          |
|-----------------------------|----------------------------------------------------------------------------------|---------|----------------------|---------|----------|
|                             |                                                                                  |         |                      | Calcd.  | Observed |
| MEK28GT-A466V ( <b>18</b> ) | C <sub>147</sub> H <sub>262</sub> N <sub>40</sub> O <sub>44</sub>                | 3293.95 | [M+4H] <sup>4+</sup> | 824.50  | 824.07   |
|                             |                                                                                  |         | [M+3H] <sup>3+</sup> | 1098.99 | 1098.88  |
| MEK28GT-A473V ( <b>19</b> ) | C <sub>147</sub> H <sub>262</sub> N <sub>40</sub> O <sub>44</sub>                | 3293.95 | [M+4H] <sup>4+</sup> | 824.50  | 824.09   |
|                             |                                                                                  |         | [M+3H] <sup>3+</sup> | 1098.99 | 1099.14  |
| MEK28GT-L463F ( <b>20</b> ) | C <sub>148</sub> H <sub>256</sub> N <sub>40</sub> O <sub>44</sub>                | 3299.91 | [M+4H] <sup>4+</sup> | 825.99  | 825.54   |
|                             |                                                                                  |         | [M+3H] <sup>3+</sup> | 1100.98 | 1102.75  |
| MEK28GT-L470F ( <b>21</b> ) | C <sub>148</sub> H <sub>256</sub> N <sub>40</sub> O <sub>44</sub>                | 3299.91 | [M+4H] <sup>4+</sup> | 825.99  | 825.47   |
| MEK28GT-L477F ( <b>22</b> ) | C <sub>148</sub> H <sub>256</sub> N <sub>40</sub> O <sub>44</sub>                | 3299.91 | [M+4H] <sup>4+</sup> | 825.99  | 825.48   |
| MEK28GT+S480 ( <b>23</b> )  | C <sub>148</sub> H <sub>263</sub> N <sub>41</sub> O <sub>46</sub>                | 3352.97 | [M+4H] <sup>4+</sup> | 839.25  | 838.80   |
| HR1X                        | C <sub>222</sub> H <sub>367</sub> N <sub>65</sub> O <sub>76</sub> S <sub>2</sub> | 5226.88 | [M+6H] <sup>6+</sup> | 872.15  | 872.41   |
|                             |                                                                                  |         | [M+5H] <sup>5+</sup> | 1046.38 | 1045.78  |
|                             |                                                                                  |         | [M+4H] <sup>4+</sup> | 1307.73 | 1307.85  |
| HR1Y                        | C <sub>236</sub> H <sub>391</sub> N <sub>69</sub> O <sub>81</sub> S <sub>2</sub> | 5555.25 | [M+6H] <sup>6+</sup> | 926.88  | 926.72   |
|                             |                                                                                  |         | [M+5H] <sup>5+</sup> | 1112.06 | 1112.02  |
|                             |                                                                                  |         | [M+4H] <sup>4+</sup> | 1389.82 | 1389.76  |

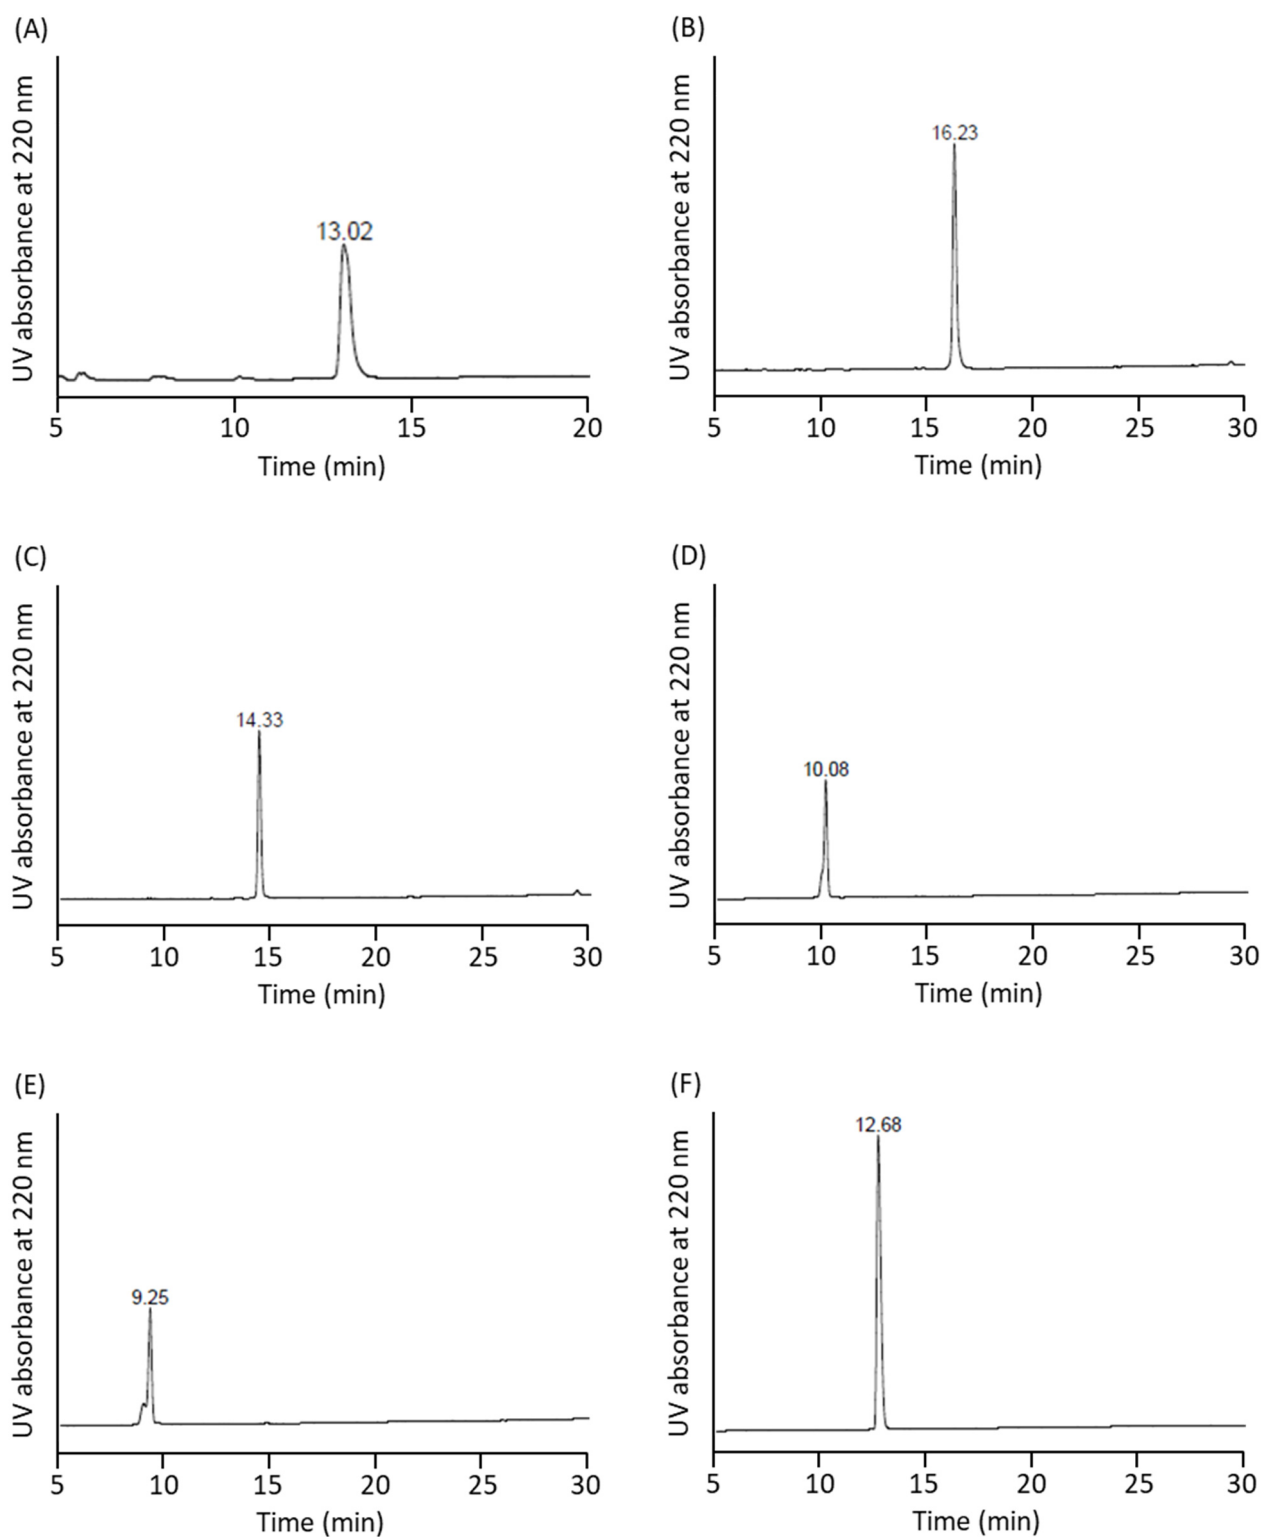

**Fig. S3.** HPLC chromatograms of purified synthetic peptides. (A) HR1-40; (B–F) peptides 3–7. *HPLC conditions:* (A) Linear gradient of 40–60% CH<sub>3</sub>CN in H<sub>2</sub>O over 20 min; (B–F) Linear gradient of 20–50% CH<sub>3</sub>CN in H<sub>2</sub>O over 30 min. †A shoulder peak with identical mass was observed in peptides 5 (D) and 6 (E); the species responsible for this peak was not identified.

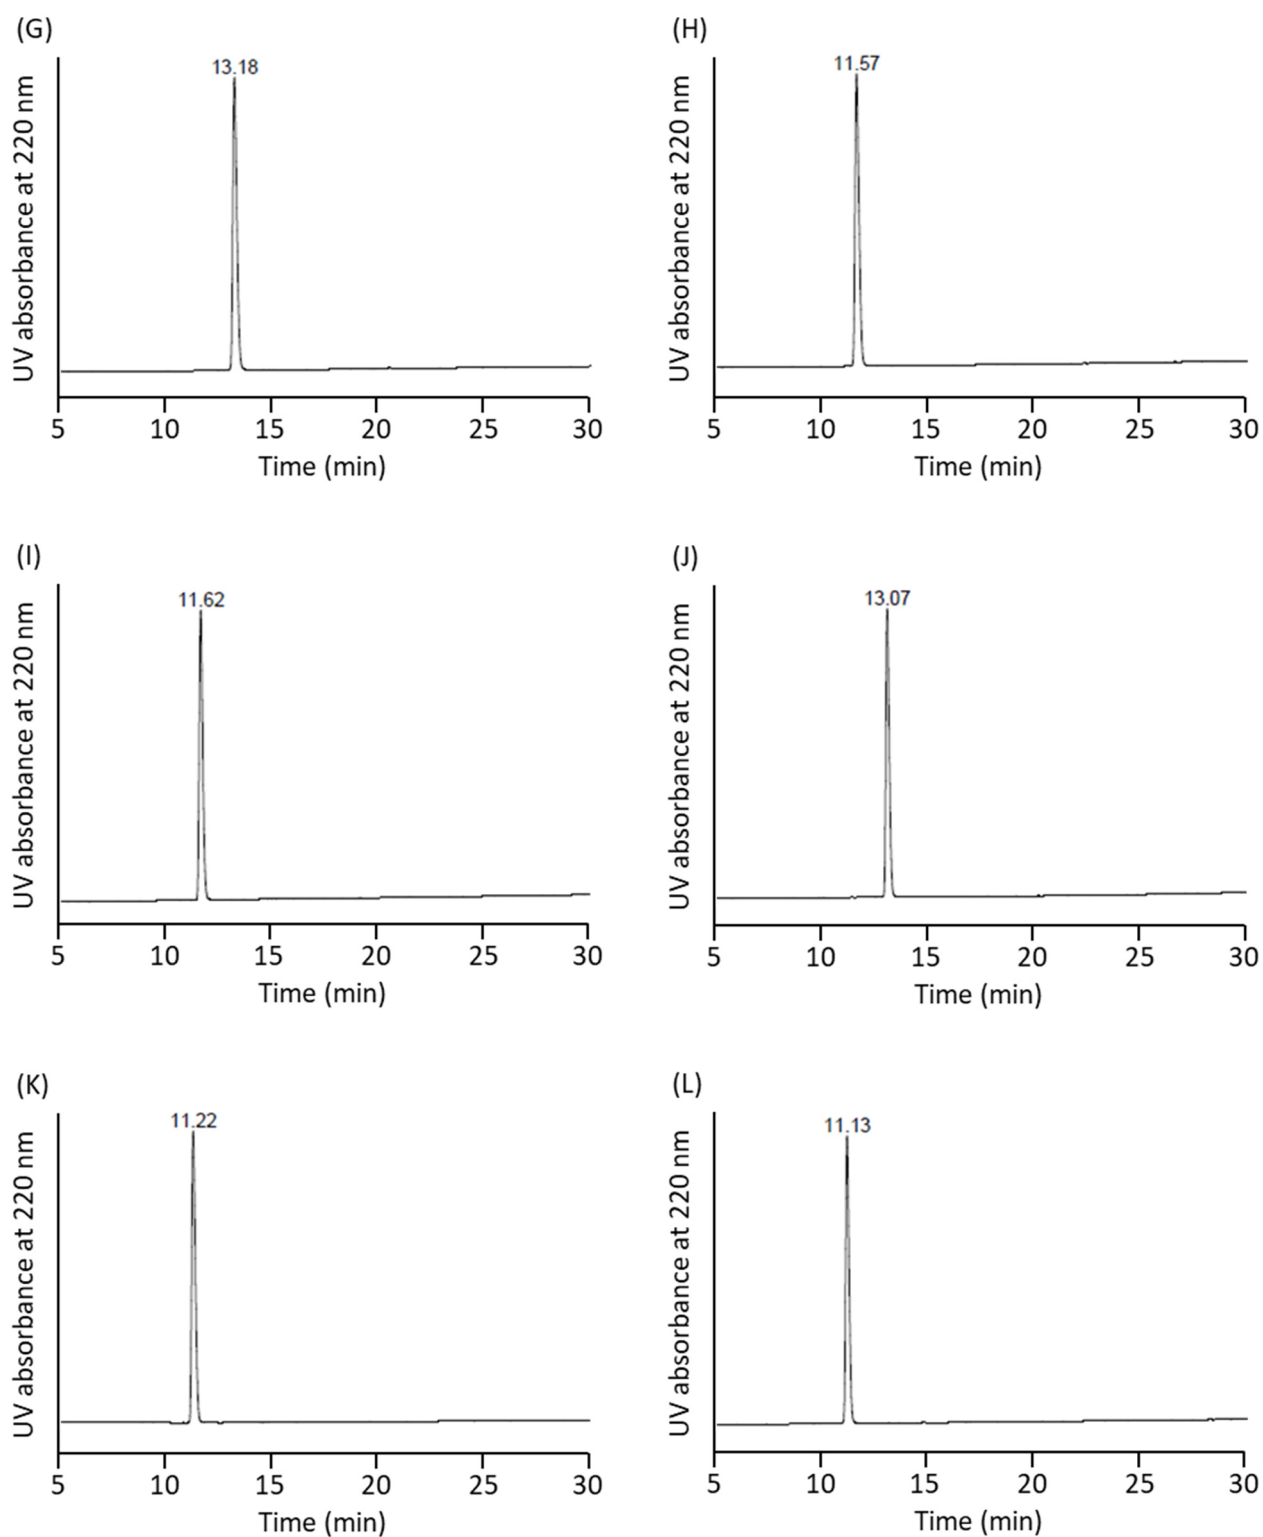

**Fig. S3.** (continued) HPLC chromatograms of purified synthetic peptides. (G–L) peptides **8–13**. HPLC conditions: Linear gradient of 20–50% CH<sub>3</sub>CN in H<sub>2</sub>O over 30 min.

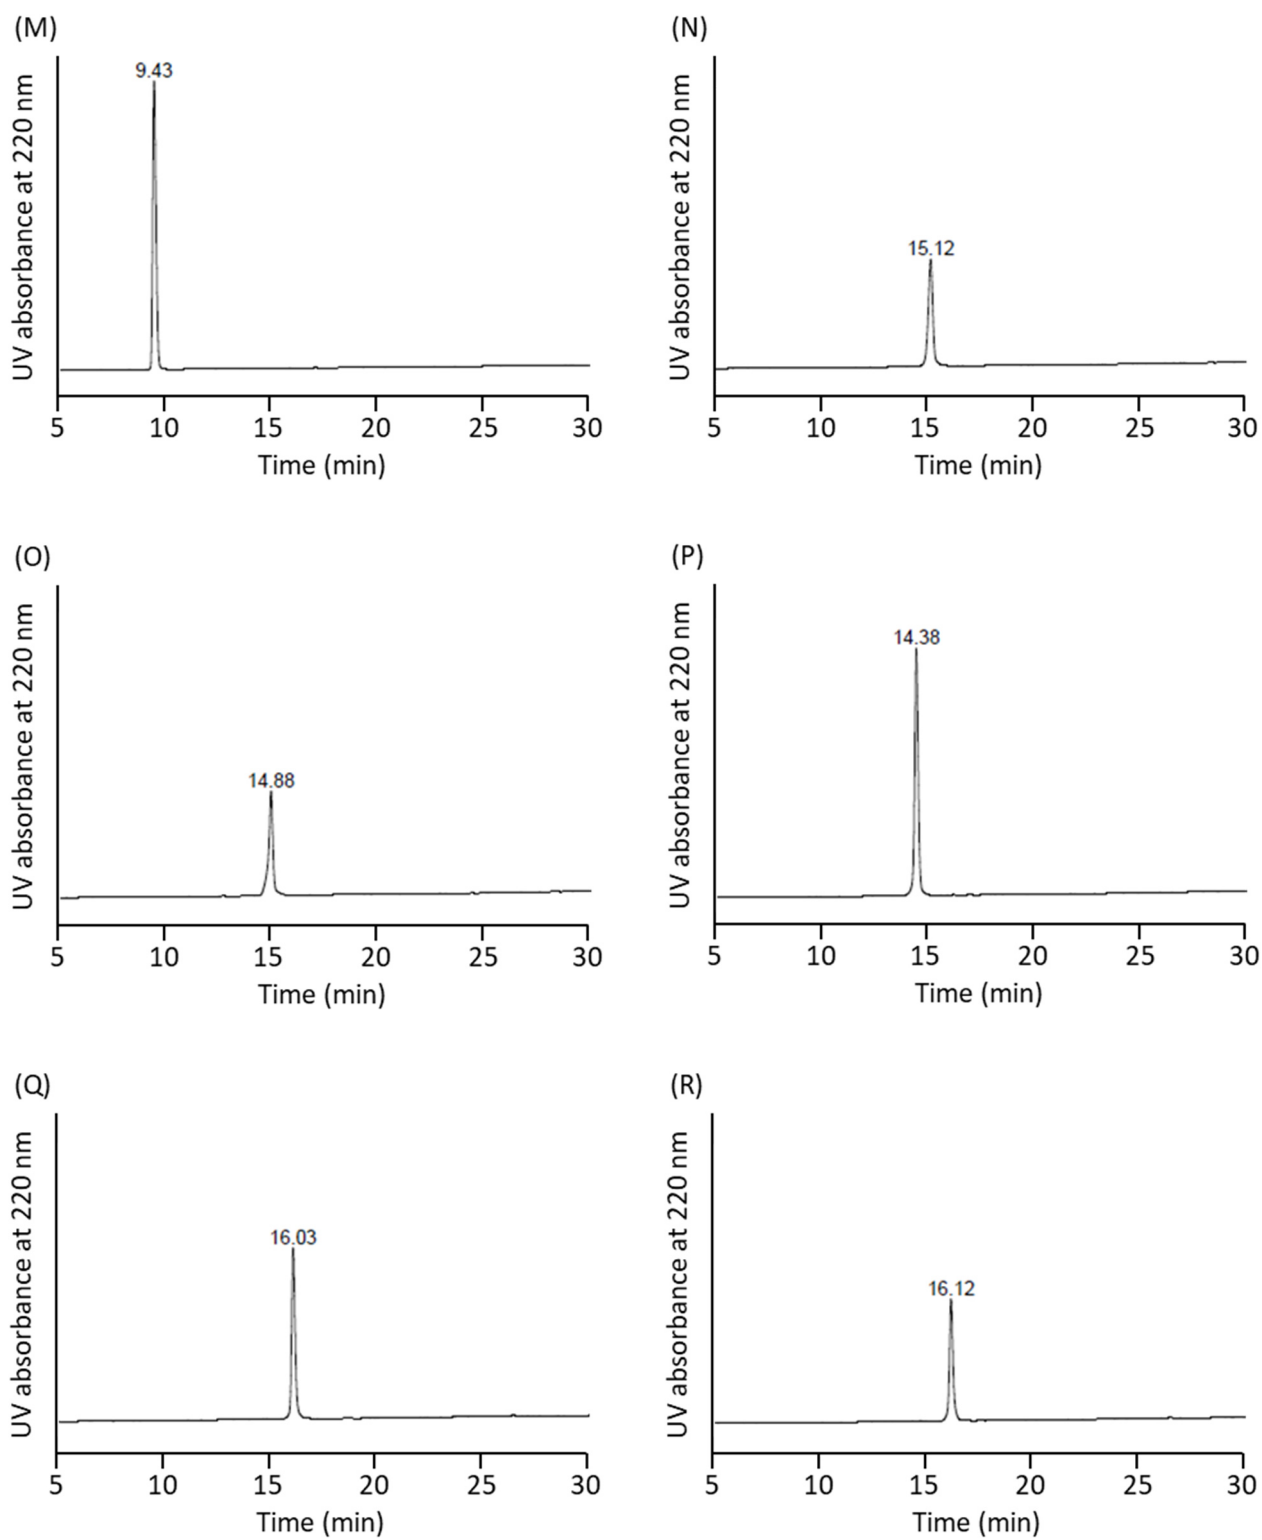

**Fig. S3.** (continued) HPLC chromatograms of purified synthetic peptides. (M–R) peptides 14–19. *HPLC conditions:* Linear gradient of 20–50% CH<sub>3</sub>CN in H<sub>2</sub>O over 30 min.

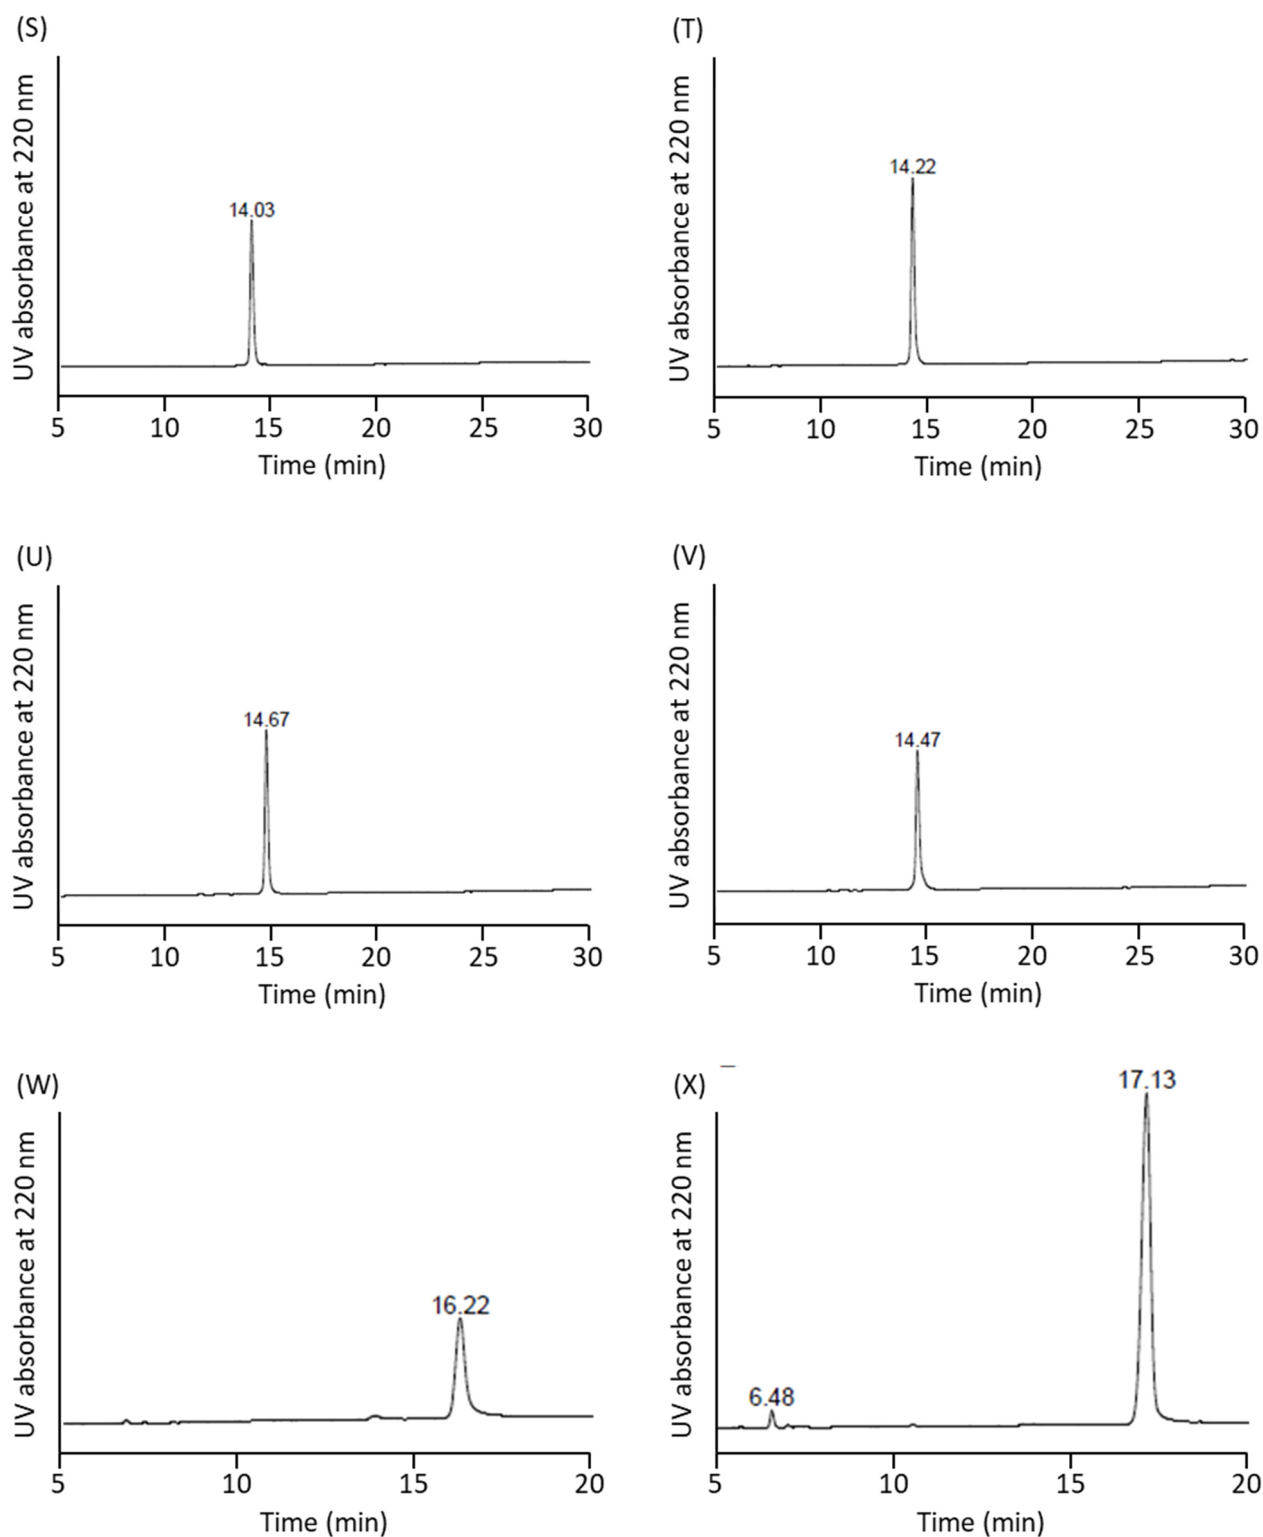

**Fig. S3.** (continued) HPLC chromatograms of purified synthetic peptides. (S–V) peptides **20–23**; (W) HR1X; (X) HR1Y. *HPLC conditions:* (S–V) Linear gradient of 20-50% CH<sub>3</sub>CN in H<sub>2</sub>O over 30 min; (W, X) Linear gradient of 40-60% CH<sub>3</sub>CN in H<sub>2</sub>O over 20 min.

## Reference

- S1. K. Hirata, A. Takahara, S. Suzuki, S. Murakami, K. Kawaji, A. Nishiyama, M. Sasano, M. Shoji-Ueno, E. Usui, K. Murayama, H. Hayashi, S. Oishi, and E. N. Kodama, *iScience*, 2024, **27**, 108961.
